# Supplementary material for: Morphological characterization and staging of bumble bee pupae
Source: PeerJ. 2018 Dec 18;6:e6089. doi: 10.7717/peerj.6089 (PMC6302898; doi:10.7717/peerj.6089)
Supplement: Supplemental Information 2 [file peerj-06-6089-s002.xlsx]

## Sheet: Sheet1
Effects of temperature, caste, body sizes and species on pupal duration
Species	colony	caste	number	size category	temperature	pupa duration (hours)	Inter-tegular span
Bimpatiens	koppert-1	worker	2	large	32°C	189	4.25
Bimpatiens	koppert-1	worker	4	large	32°C	183	4
Bimpatiens	koppert-1	worker	6	large	32°C	172	4.1
Bimpatiens	koppert-1	worker	7	large	32°C	181	4.1
Bimpatiens	koppert-1	worker	9	large	32°C	181	4.1
Bimpatiens	koppert-1	worker	11	large	32°C	180	4.1
Bimpatiens	koppert-1	male	5	medium	32°C	186	3.8
Bimpatiens	koppert-1	male	10	medium	32°C	191	3.6
Bimpatiens	koppert-1	male	13	medium	32°C	180.333	3.5
Bimpatiens	koppert-1	worker	3	medium	32°C	162	3.8
Bimpatiens	koppert-1	worker	1	medium	32°C	177	3.65
Bimpatiens	koppert-1	worker	8	medium	32°C	181	3.75
Bimpatiens	koppert-1	worker	12	medium	32°C	181	3.8
Bimpatiens	Koppert-1	male	1	small	29°C	204.833	3
Bimpatiens	Koppert-1	male	2	small	29°C	206	3
Bimpatiens	Koppert-2	queen	1	N/A	32°C	257	4
Bimpatiens	Koppert-2	queen	2	N/A	32°C	246.5	4.25
Bimpatiens	Koppert-2	queen	3	N/A	32°C	253	4.25
Bimpatiens	Koppert-2	queen	4	N/A	32°C	238	4.25
Bimpatiens	Koppert-2	queen	5	N/A	32°C	231	3.8
Bimpatiens	Koppert-2	queen	6	N/A	32°C	240.5	3.8
Bimpatiens	Koppert-2	queen	7	N/A	32°C	235.5	3.75
Bimpatiens	Koppert-2	queen	8	N/A	32°C	244	4.25
Bimpatiens	Koppert-2	worker	2	large	32°C	177	4.25
Bimpatiens	Koppert-2	worker	3	large	32°C	177	4.25
Bimpatiens	Koppert-2	worker	5	large	32°C	174	4
Bimpatiens	Koppert-2	worker	12	large	32°C	181	4.25
Bimpatiens	Koppert-2	worker	15	large	32°C	180	4.25
Bimpatiens	Koppert-2	male	6	medium	32°C	189	3.75
Bimpatiens	Koppert-2	male	13	medium	32°C	186	3.75
Bimpatiens	Koppert-2	male	14	medium	32°C	186	3.75
Bimpatiens	Koppert-2	male	17	medium	32°C	186	3.75
Bimpatiens	Koppert-2	male	19	medium	32°C	194	3.75
Bimpatiens	Koppert-2	worker	1	medium	32°C	177	3.75
Bimpatiens	Koppert-2	worker	4	medium	32°C	168	3.8
Bimpatiens	Koppert-2	worker	7	medium	32°C	167	3.75
Bimpatiens	Koppert-2	worker	8	medium	32°C	171	3.75
Bimpatiens	Koppert-2	worker	9	medium	32°C	178	3.75
Bimpatiens	Koppert-2	worker	10	medium	32°C	182	3.75
Bimpatiens	Koppert-2	worker	18	medium	32°C	170	3.5
Bimpatiens	Koppert-2	male	16	small	32°C	186	3.3
Bimpatiens	koppert-3	male	2	medium	32°C	193	3.5
Bimpatiens	koppert-3	male	3	medium	32°C	191	3.75
Bimpatiens	koppert-3	male	4	medium	32°C	193	3.6
Bimpatiens	koppert-3	male	5	medium	32°C	193	3.75
Bimpatiens	koppert-3	male	7	medium	32°C	194	3.6
Bimpatiens	koppert-3	male	1	small	32°C	186.5	3.25
Bimpatiens	koppert-3	male	6	small	32°C	186	3.25
Bimpatiens	koppert-3	male	8	small	32°C	186	2.9
Bimpatiens	koppert-3	male	9	small	32°C	185	3.2
Bimpatiens	koppert-3	male	10	small	32°C	194	3.25
Bimpatiens	koppert-3	male	11	small	32°C	197	3.25
Bimpatiens	Koppert-3	male	1	small	29°C	200	3
Bimpatiens	Koppert-4	queen	2	Large	29°C	266	5.53333
Bimpatiens	Koppert-4	queen	4	Large	29°C	266	5.66667
Bimpatiens	Koppert-4	queen	1	Large	29°C	267	5
Bimpatiens	Koppert-4	queen	3	Large	29°C	261	5.13333
Bimpatiens	Koppert-4	worker	4	large	29°C	213	4.15
Bimpatiens	Koppert-4	worker	6	Large	32°C	182	4.15
Bimpatiens	Koppert-4	worker	1	medium	29°C	203	3.75
Bimpatiens	Koppert-4	worker	2	medium	29°C	209.833	3.75
Bimpatiens	Koppert-4	worker	3	medium	29°C	209	3.75
Bimpatiens	Koppert-4	worker	5	medium	29°C	217	3.95
Bimpatiens	Koppert-4	worker	1	medium	32°C	168	3.75
Bimpatiens	Koppert-4	worker	2	medium	32°C	168	3.65
Bimpatiens	Koppert-4	worker	6	small	29°C	171	2.75
Bimpatiens	Koppert-4	worker	7	small	29°C	179	2.95
Bimpatiens	Koppert-4	worker	8	small	29°C	181	3.25
Bimpatiens	Koppert-4	worker	9	small	29°C	183.5	2.75
Bimpatiens	Koppert-4	worker	10	small	29°C	183	2.95
Bimpatiens	Koppert-4	worker	11	small	29°C	185	2.8
Bimpatiens	Koppert-4	worker	12	small	29°C	185	3
Bimpatiens	Koppert-4	worker	3	small	32°C	168	3.25
Bimpatiens	Koppert-4	worker	4	small	32°C	172	3.25
Bimpatiens	Koppert-4	worker	5	small	32°C	165	3.1
Bimpatiens	Koppert-4	worker	7	small	32°C	163	3
Bimpatiens	Koppert-4	worker	8	small	32°C	175	3
Bimpatiens	Koppert-4	worker	9	small	32°C	157	2.55
Bimpatiens	Koppert-4	worker	10	small	32°C	157	2.6
Bimpatiens	Koppert-4	worker	11	small	32°C	157.5	2.75
Bimpatiens	Koppert-4	worker	12	small	32°C	161	2.75
Bimpatiens	Koppert-4	worker	13	small	32°C	161	2.75
Bimpatiens	Koppert-4	worker	14	small	32°C	163	3
Bimpatiens	PSU17	worker	5	large	32°C	181.5	4
Bimpatiens	PSU17	worker	6	large	32°C	175	4.15
Bimpatiens	PSU17	worker	9	large	32°C	181	4.1
Bimpatiens	PSU17	worker	3	medium	32°C	169	3.65
Bimpatiens	PSU17	worker	7	medium	32°C	181.5	3.8
Bimpatiens	PSU17	worker	8	medium	32°C	169	3.5
Bimpatiens	PSU17	worker	11	medium	32°C	166	3.5
Bimpatiens	PSU17	worker	13	medium	32°C	166	3.75
Bimpatiens	PSU17	worker	15	medium	32°C	163	3.5
Bimpatiens	PSU17	worker	17	medium	32°C	180	3.5
Bimpatiens	PSU17	worker	1	small	32°C	167	3.3
Bimpatiens	PSU17	worker	2	small	32°C	166	3.25
Bimpatiens	PSU17	worker	4	small	32°C	167	3.25
Bimpatiens	PSU17	worker	10	small	32°C	155	3.3
Bimpatiens	PSU17	worker	12	small	32°C	165	3.3
Bimpatiens	PSU17	worker	14	small	32°C	148.5	3.1
Bimpatiens	PSU17	worker	16	small	32°C	146.5	3.4
Bimpatiens	PSU-17	worker	3	larege	29°C	201	4.15
Bimpatiens	PSU-17	worker	4	larege	29°C	208	4
Bimpatiens	PSU-17	worker	5	larege	29°C	208	4.1
Bimpatiens	PSU-17	worker	6	larege	29°C	204	4.1
Bimpatiens	PSU-17	worker	7	larege	29°C	209.5	4.1
Bimpatiens	PSU-17	worker	1	medium	29°C	200	3.6
Bimpatiens	PSU-17	worker	2	medium	29°C	203	3.5
B.vosnesenskii	Vos-5	male	1	small	32°C	181	3.25
B.vosnesenskii	Vos-5	male	3	small	32°C	179.5	3.25
B.vosnesenskii	Vos-5	male	6	small	32°C	181	3.45
B.vosnesenskii	Vos-5	male	7	small	32°C	181	3.15
B.vosnesenskii	Vos-5	male	8	small	32°C	179	3.25
B.vosnesenskii	Vos-5	male	9	small	32°C	182	3.25
B.vosnesenskii	Vos-5	male	10	small	32°C	166	2.75
B.vosnesenskii	Vos-5	male	11	small	32°C	179	2.75
B.vosnesenskii	Vos-5	male	1	small	29°C	211.5	3.25
B.vosnesenskii	Vos-5	male	2	small	29°C	201	3
B.vosnesenskii	Vos-5	male	3	small	29°C	199	3.25
						178.562
						5.19228
						1.83575
