# Supplementary material for: Morphological characterization and staging of bumble bee pupae
Source: PeerJ. 2018 Dec 18;6:e6089. doi: 10.7717/peerj.6089 (PMC6302898; doi:10.7717/peerj.6089)
Supplement: Supplemental Information 5 [file peerj-06-6089-s005.xlsx]

## Sheet: Sheet1
Duration of indiviudal pupal stages varies across body sizes
Sample annotation: size (M=medium, S=small)-Stage number
Sample	Replicates	Duration
M-0	1	2.5
M-0	2	0.5
M-0	3	1.5
M-0	4	3
M-1	1	8.5
M-1	2	8.5
M-1	3	3.25
M-1	4	2
M-1	5	8
M-1	6	8.5
M-1	7	8.5
M-1	8	7
M-1	9	4.5
M-1	10	5.5
M-1	11	1
M-1	12	2.5
M-1	13	8
M-1	14	8.5
M-1	15	8
M-2	1	10.5
M-2	2	15.75
M-2	3	19
M-2	4	10.5
M-2	5	10.5
M-2	6	11
M-2	7	17.6667
M-2	8	3.25
M-2	9	10
M-2	10	18
M-2	11	12
M-2	12	14.5
M-3	1	8.5
M-3	2	30
M-3	3	35
M-3	4	8.5
M-3	5	8
M-3	6	9.5
M-3	7	15.25
M-3	8	14.6667
M-3	9	7.5
M-3	10	15
M-3	11	32
M-3	12	16
M-4	1	8
M-4	2	5.5
M-4	3	8
M-4	4	9.5
M-4	5	9.5
M-4	6	7
M-4	7	5.66667
M-5	1	8.5
M-5	2	11.3333
M-6	1	15
M-6	2	12.875
M-6	3	9.08333
M-6	4	17
M-6	5	8
M-7	1	20.75
M-7	2	22.1667
M-7	3	18.17
M-7	4	34.25
M-7	5	23
M-7	6	28.6667
M-7	7	29.0417
M-7	8	26.125
M-7	9	27.75
M-7	10	20.875
M-7	11	33.625
M-7	12	26.25
M-7	13	12
M-7	14	20.6667
M-7	15	20.6667
M-8	1	22
M-8	2	14.0833
M-8	3	18.08
M-8	4	9
M-8	5	14.0833
M-8	6	13.0833
M-8	7	19
M-8	8	1.25
M-8	9	21.25
M-8	10	11.5
M-8	11	18.25
M-8	12	17.5833
M-8	13	17.5833
M-9	1	10.25
M-9	2	10.25
M-9	3	16.5
M-9	4	15.25
M-9	5	10
M-9	6	10
M-9	7	11.5
M-9	8	14
M-10	1	7.25
M-10	2	15.5
M-10	3	7.75
M-10	4	4.25
M-10	5	6.5
M-10	6	8.25
M-10	7	7.75
M-10	8	7.25
M-10	9	8.25
M-10	10	7.75
M-11	1	8.25
M-11	2	7
M-11	3	8.66667
M-11	4	8.5
M-11	5	8.25
M-11	6	10
M-11	7	7
M-11	8	10
M-11	9	4.5
M-11	10	7
M-11	11	8.66667
M-11	12	7.5
M-11	13	7
M-11	14	7
M-12	1	10.6667
M-12	2	9
M-12	3	10.25
M-12	4	16.5
M-12	5	7.66667
M-12	6	10.5
M-12	7	14.5
M-12	8	9
M-12	9	8
M-12	10	9
M-13	1	5.33333
M-13	2	7.75
M-13	3	8.5
M-13	4	10.75
M-13	5	7.66667
M-13	6	6.83333
M-13	7	2.25
M-13	8	8.5
M-13	9	8
M-13	10	8
M-13	11	7.75
M-14	1	20.5
M-14	2	12.75
M-14	3	14.5833
M-14	4	17
M-14	5	14.5
M-14	6	15.3333
M-14	7	20.5
M-14	8	23.75
M-14	9	12
M-14	10	19.5
M-14	11	18.75
M-14	12	13.17
M-14	13	22.3333
M-14	14	19.75
M-14	15	18.875
M-15	1	14.5
M-15	2	14.5
M-15	3	12.6667
M-15	4	18.75
M-15	5	6.5
M-15	6	15
M-15	7	15
M-15	8	18.5
M-15	9	12.75
M-15	10	18.25
M-15	11	13.1667
M-15	12	14
M-16	1	6.5
M-16	2	6.5
M-16	3	8.25
M-16	4	3.75
M-16	5	3
M-16	6	5
M-16	7	5
M-16	8	6.5
M-16	9	5.25
M-16	10	7.5
M-16	11	4.5
S-0	1	1
S-0	2	2
S-0	3	2
S-0	4	2.25
S-0	5	2.5
S-0	6	2.5
S-0	7	2.5
S-0	8	3
S-0	9	3
S-0	10	3.5
S-0	11	6
S-0	12	7.5
S-0	13	0
S-0	14	2.5
S-0	15	0.5
S-0	16	1.5
S-0	17	3
S-1	1	2
S-1	2	2
S-1	3	2
S-1	4	2
S-1	5	3.25
S-1	6	3.25
S-1	7	3.25
S-1	8	3.25
S-1	9	3.5
S-1	10	3.75
S-1	11	4.5
S-1	12	4.5
S-1	13	4.5
S-1	14	5.5
S-1	15	5.75
S-1	16	6.75
S-1	17	7
S-1	18	7
S-1	19	7
S-1	20	7.5
S-1	21	8
S-1	22	8.5
S-1	23	8.5
S-2	1	6.5
S-2	2	7
S-2	3	9
S-2	4	11
S-2	5	12
S-2	6	14
S-2	7	14
S-2	8	15
S-2	9	15.1667
S-2	10	15.25
S-2	11	15.25
S-2	12	15.5
S-2	13	15.75
S-2	14	15.75
S-2	15	15.75
S-2	16	17.6667
S-2	17	19
S-2	18	19
S-2	19	19
S-2	20	19
S-3	1	7.5
S-3	2	8
S-3	3	8
S-3	4	8
S-3	5	8
S-3	6	8
S-3	7	8
S-3	8	8
S-3	9	8.58333
S-3	10	9
S-3	11	9.5
S-3	12	12.6667
S-3	13	12.6667
S-3	14	14.6667
S-4	1	8.58333
S-4	2	12.6667
S-4	3	5.16667
S-4	4	6.16667
S-4	5	6.16667
S-4	6	6.16667
S-4	7	6.25
S-4	8	5.75
S-5	1	11.3333
S-5	2	12.6667
S-5	3	11.4583
S-5	4	11.3333
S-5	5	11.3333
S-5	6	11.3333
S-5	7	8.5
S-5	8	10
S-5	9	6.91667
S-6	1	8
S-6	2	11.3333
S-6	3	7.25
S-6	4	8.5
S-6	5	6.16667
S-6	6	7
S-6	7	7
S-6	8	7
S-6	9	0.375
S-6	10	5.66667
S-6	11	17
S-6	12	17
S-6	13	7.75
S-6	14	8.08333
S-6	15	11.3333
S-7	1	28.3875
S-7	2	26.25
S-7	3	22.75
S-7	4	30.25
S-7	5	23.5
S-7	6	26.25
S-7	7	29.25
S-7	8	22.25
S-7	9	20.75
S-7	10	28.7917
S-7	11	20.7917
S-7	12	31.8333
S-7	13	27.25
S-7	14	27.25
S-7	15	27.25
S-7	16	33.25
S-7	17	28.6667
S-7	18	23.3333
S-7	19	12
S-8	1	11.55
S-8	2	12
S-8	3	8.25
S-8	4	10.25
S-8	5	12
S-8	6	17.5
S-8	7	17.5
S-8	8	16.25
S-8	9	13.0833
S-8	10	12.8333
S-8	11	22.75
S-8	12	9
S-8	13	9
S-8	14	9
S-8	15	11.5
S-8	16	14.0833
S-8	17	17.5
S-8	18	22.25
S-9	1	8.25
S-9	2	7.25
S-9	3	17.75
S-9	4	12
S-9	5	11.5
S-9	6	10.25
S-9	7	17.5
S-9	8	17.5
S-10	1	6.5
S-10	2	8.25
S-10	3	5.41667
S-10	4	4.75
S-10	5	7.75
S-10	6	7.25
S-10	7	8.25
S-10	8	8.25
S-10	9	8.25
S-10	10	7
S-10	11	8.25
S-11	1	5
S-11	2	7.66667
S-11	3	7
S-11	4	10
S-11	5	8.16667
S-11	6	8.16667
S-11	7	3.08333
S-11	8	5.25
S-11	9	8.66667
S-11	10	6.5
S-11	11	9
S-11	12	8.16667
S-12	1	6.83333
S-12	2	7.66667
S-12	3	13.0833
S-12	4	13.0833
S-12	5	8.25
S-12	6	13.5
S-12	7	13.0833
S-12	8	14.75
S-12	9	10
S-12	10	7.75
S-13	1	10.5
S-13	2	8.5
S-13	3	7.66667
S-13	4	6.83333
S-13	5	6.58
S-13	6	6.58333
S-13	7	8.5
S-13	8	4.83333
S-13	9	7
S-13	10	9
S-13	11	9.75
S-13	12	7.75
S-13	13	7.58
S-13	14	9
S-13	15	10
S-13	16	7.66667
S-13	17	7.66667
S-13	18	1.75
S-13	19	3.16667
S-13	20	4
S-14	1	17
S-14	2	13.3333
S-14	3	19
S-14	4	19.75
S-14	5	15.3333
S-14	6	20.5
S-14	7	13.17
S-14	8	20.6667
S-14	9	14.5
S-14	10	14.5833
S-14	11	20.75
S-14	12	23.5833
S-14	13	24
S-14	14	10.75
S-14	15	12.75
S-14	16	11.42
S-14	17	20.5
S-14	18	14.5
S-14	19	20.1667
S-14	20	20.1667
S-14	21	25.5
S-14	22	17.625
S-14	23	26.3333
S-14	24	19
S-15	1	14.1667
S-15	2	8
S-15	3	7.5
S-15	4	14
S-15	5	11
S-15	6	10.5
S-15	7	12.6667
S-15	8	6.5
S-15	9	5.91667
S-15	10	15
S-15	11	14.5
S-15	12	14.75
S-15	13	7
S-15	14	13.3333
S-15	15	11
S-15	16	14
S-15	17	12
S-16	1	9
S-16	2	6.5
S-16	3	11.25
S-16	4	8.25
S-16	5	12
S-16	6	15
S-16	7	6
S-16	8	6.5
S-16	9	3
S-16	10	7.5
S-16	11	7.16667
S-16	12	4.5
S-16	13	7
